# Supplementary material
Source: PubMed Central journal article supplement (PMC4014002)
Supplement: NIHMS575206-supplement-Supp_Table_S1-S2.pdf [file NIHMS575206-supplement-Supp_Table_S1-S2.pdf]

**Table S1.** L-FABP secondary structural changes (%) upon binding stearic acid (SA), arachidonic acid (AA), eicosapentaenoic acid (EPA), docosahexaenoic acid (DHA).

**RAT L-FABP**

|                    | SA            | AA             | EPA             | DHA             |
|--------------------|---------------|----------------|-----------------|-----------------|
| <b>Helix reg</b>   | -1.4 ± 0.8    | 24.7 ± 0.5 *#  | 1.8 ± 0.8 #     | 18.5 ± 0.7 *#%  |
| <b>Helix dist</b>  | -10.4 ± 0.9 * | 3.3 ± 0.9 *#   | -12.1 ± 1.1 *\$ | -0.8 ± 0.8 #%   |
| <b>Helix total</b> | -4.8 ± 1.1 *  | 16.7 ± 1.0 *#  | -3.3 ± 1.5 \$   | 11.3 ± 1.0 *#%  |
| <b>Sheet reg</b>   | -1.4 ± 0.9    | -16.3 ± 0.8 *# | -2.5 ± 1.0 \$   | -18.9 ± 1.0 *#% |
| <b>Sheet dist</b>  | -0.2 ± 0.3    | 8.2 ± 0.2 *#   | 0.2 ± 0.2 \$    | 2.4 ± 0.2 *#%   |
| <b>Sheet total</b> | -1.0 ± 0.9    | -7.9 ± 0.9 *#  | 1.6 ± 1.0 \$    | -11.5 ± 1.1 *#% |
| <b>Turn</b>        | 4.3 ± 0.6 *   | -20.5 ± 0.5 *# | 2.8 ± 0.7 *\$   | -5.7 ± 0.7 *#%  |
| <b>Unordered</b>   | 7.5 ± 0.7 *   | -1.3 ± 0.5 #   | 7.0 ± 0.7 *\$   | -0.1 ± 1.1 #%   |

**HUMAN T94T WT**

|                    | SA           | AA             | EPA           | DHA           |
|--------------------|--------------|----------------|---------------|---------------|
| <b>Helix reg</b>   | 18.3 ± 0.2 * | 17.2 ± 0.3 *#  | 5.0 ± 0.4 *#  | 4.4 ± 0.3 *#  |
| <b>Helix dist</b>  | -5.8 ± 0.4 * | 10.7 ± 0.6 *#  | 1.5 ± 0.4 *#  | -5.2 ± 0.5 *# |
| <b>Helix total</b> | 8.5 ± 0.3 *  | 14.6 ± 0.5 *#  | 3.6 ± 0.4 *#  | 0.5 ± 0.5 #   |
| <b>Sheet reg</b>   | -2.4 ± 0.5 * | -8.8 ± 0.5 *#  | 3.6 ± 0.4 *#  | 2.4 ± 0.7 *#  |
| <b>Sheet dist</b>  | -3.8 ± 0.2 * | -3.1 ± 0.1 *#  | -2.0 ± 0.1 *# | -1.1 ± 0.2 *# |
| <b>Sheet total</b> | -2.9 ± 0.7 * | -6.8 ± 0.5 *#  | 1.6 ± 0.4 #   | 1.2 ± 0.8 #   |
| <b>Turn</b>        | 7.1 ± 0.6 *  | 12.5 ± 0.8 *#  | 7.2 ± 0.6 *\$ | 5.6 ± 0.7 *\$ |
| <b>Unordered</b>   | -7.5 ± 0.7 * | -11.0 ± 0.9 *# | -9.2 ± 0.8 *  | -5.4 ± 0.9 *# |

**HUMAN T94A VARIANT**

|                    | SA             | AA              | EPA             | DHA              |
|--------------------|----------------|-----------------|-----------------|------------------|
| <b>Helix reg</b>   | 3.7 ± 0.4 * †  | 8.4 ± 0.3 *# †  | 2.2 ± 0.4 *# †  | -1.5 ± 0.1 *#% † |
| <b>Helix dist</b>  | -5.2 ± 0.5 *   | 1.1 ± 0.6 # †   | -2.2 ± 0.5 *# † | 7.7 ± 0.5 *#% †  |
| <b>Helix total</b> | 0.1 ± 0.6 †    | 5.5 ± 0.8 *# †  | 0.4 ± 0.8 \$ †  | 2.2 ± 0.6 \$     |
| <b>Sheet reg</b>   | 4.0 ± 0.6 * †  | 4.0 ± 0.4 * †   | 2.5 ± 0.6 *     | 0.5 ± 0.4 #%     |
| <b>Sheet dist</b>  | -1.8 ± 0.1 * † | -1.6 ± 0.1 * †  | -0.5 ± 0.2 *# † | 1.8 ± 0.1 *#% †  |
| <b>Sheet total</b> | 1.9 ± 0.6 †    | 1.9 ± 0.4 †     | 1.4 ± 0.8       | 1.0 ± 0.5        |
| <b>Turn</b>        | -2.8 ± 0.7 * † | -2.2 ± 0.8 †    | -0.9 ± 0.4 †    | -1.6 ± 0.5 †     |
| <b>Unordered</b>   | 0.2 ± 0.6 †    | -5.2 ± 1.4 *# † | -1.3 ± 0.6 \$ † | -1.8 ± 0.8 \$ †  |

\*,  $P < 0.05$  vs buffer; #,  $P < 0.05$  vs SA; \$,  $P < 0.05$  vs AA; %,  $P < 0.05$  vs EPA; †,  $P < 0.05$  vs T94T wt.

**Table S2.** L-FABP secondary structure changes (%) upon binding to intermediates in TG synthesis.

**RAT L-FABP**

|                    | <b>O-CoA</b>  | <b>LPA</b>     | <b>PA</b>        | <b>OG</b>        | <b>POG</b>         |
|--------------------|---------------|----------------|------------------|------------------|--------------------|
| <b>Helix reg</b>   | -2.2 ± 0.8 *  | 13.1 ± 0.8 **  | -4.5 ± 0.5 **\$  | 2.7 ± 0.6 **\$%  | 4.9 ± 0.7 **\$%@   |
| <b>Helix dist</b>  | 17.5 ± 0.7 *  | 25.6 ± 0.7 **  | -0.5 ± 0.4 #     | -5.6 ± 0.3 **\$% | -5.8 ± 0.4 **\$%   |
| <b>Helix total</b> | 6.0 ± 1.4 *   | 18.3 ± 1.5 **  | -2.9 ± 0.9 #     | -0.8 ± 0.8 #     | 0.5 ± 0.9 #        |
| <b>Sheet reg</b>   | -5.8 ± 1.1 *  | -56.5 ± 1.2 ** | -19.2 ± 0.8 **\$ | 8.3 ± 0.6 **\$%  | 10.3 ± 0.8 **\$%   |
| <b>Sheet dist</b>  | -11.5 ± 0.4 * | -28.3 ± 0.5 ** | -5.5 ± 0.2 **\$  | 1.1 ± 0.2 **\$%  | 5.0 ± 0.3 **\$%@   |
| <b>Sheet total</b> | -7.9 ± 1.4 *  | -46.1 ± 1.6 ** | -14.1 ± 0.9 **\$ | 5.6 ± 0.6 **\$%  | 8.3 ± 0.9 **\$%    |
| <b>Turn</b>        | -9.6 ± 0.4 *  | 5.5 ± 0.5 **   | 5.6 ± 0.4 **\$   | -1.8 ± 0.4 **\$% | 2.0 ± 0.5 **\$%@   |
| <b>Unordered</b>   | 9.2 ± 0.5 *   | 23.2 ± 1.0 **  | 16.6 ± 0.5 **\$  | -4.0 ± 0.7 **\$% | -12.8 ± 0.4 **\$%@ |

**HUMAN T94T WT**

|                    | <b>O-CoA</b>  | <b>LPA</b>     | <b>PA</b>         | <b>OG</b>        | <b>POG</b>         |
|--------------------|---------------|----------------|-------------------|------------------|--------------------|
| <b>Helix reg</b>   | 95.9 ± 0.6 *  | 40.2 ± 0.8 **  | 104.83 ± 0.8 **\$ | 22.4 ± 0.6 **\$% | 34.9 ± 0.4 **\$%@  |
| <b>Helix dist</b>  | 44.1 ± 0.4 *  | 9.3 ± 0.4 **   | 50.52 ± 0.6 **\$  | 5.4 ± 0.3 **\$%  | 12.6 ± 0.2 **\$%@  |
| <b>Helix total</b> | 70.2 ± 0.9 *  | 24.8 ± 1.3 **  | 77.9 ± 1.3 **\$   | 14.0 ± 0.7 **\$% | 23.8 ± 0.6 **\$%@  |
| <b>Sheet reg</b>   | -32.3 ± 1.5 * | -28.7 ± 1.0 ** | -66.90 ± 1.0 **\$ | -5.1 ± 0.5 **\$% | -14.0 ± 0.5 **\$%@ |
| <b>Sheet dist</b>  | -23.6 ± 0.4 * | -15.3 ± 0.4 ** | -38.70 ± 0.4 **\$ | -1.9 ± 0.2 **\$% | -7.5 ± 0.2 **\$%@  |
| <b>Sheet total</b> | -29.2 ± 1.8 * | -23.9 ± 1.4 ** | -56.7 ± 1.4 **\$  | -3.9 ± 0.7 **\$% | -11.7 ± 0.6 **\$   |
| <b>Turn</b>        | -3.4 ± 0.9 *  | -1.0 ± 0.4 #   | 3.73 ± 0.3 **\$   | 2.9 ± 0.3 **\$   | 3.6 ± 0.2 **\$%@   |
| <b>Unordered</b>   | -13.0 ± 0.8 * | 13.1 ± 0.5 **  | 11.12 ± 0.7 **\$  | -8.2 ± 0.3 **\$% | -6.3 ± 0.5 **\$%@  |

**HUMAN T94A VARIANT**

|                    | <b>O-CoA</b>    | <b>LPA</b>       | <b>PA</b>          | <b>OG</b>          | <b>POG</b>          |
|--------------------|-----------------|------------------|--------------------|--------------------|---------------------|
| <b>Helix reg</b>   | 95.9 ± 0.7 *    | 26.9 ± 0.7 ** †  | 126.3 ± 0.7 **\$ † | 29.4 ± 0.6 **\$% † | 31.0 ± 0.6 **\$% †  |
| <b>Helix dist</b>  | 54.2 ± 0.2 * †  | 1.4 ± 0.2 ** †   | 60.16 ± 0.5 **\$ † | 8.1 ± 0.2 **\$% †  | 10.6 ± 0.2 **\$% †  |
| <b>Helix total</b> | 75.7 ± 0.8 * †  | 14.5 ± 0.8 ** †  | 94.21 ± 0.7 **\$ † | 19.1 ± 0.7 **\$% † | 21.1 ± 0.7 **\$% †  |
| <b>Sheet reg</b>   | -59.3 ± 1.4 * † | -15.3 ± 1.0 ** † | -65.1 ± 1.2 **\$   | -8.0 ± 0.9 **\$% † | -11.3 ± 0.9 **\$% † |
| <b>Sheet dist</b>  | -36.5 ± 0.3 * † | -9.8 ± 0.2 ** †  | -32.9 ± 0.9 **\$ † | -8.0 ± 0.2 **\$% † | -5.6 ± 0.2 **\$% †  |
| <b>Sheet total</b> | -51.0 ± 1.7 * † | -13.3 ± 1.2 ** † | -53.3 ± 1.9 *\$    | -8.0 ± 1.0 **\$% † | -9.2 ± 1.0 **\$     |
| <b>Turn</b>        | 3.2 ± 0.4 * †   | -3.1 ± 0.5 ** †  | -5.1 ± 1.1 **\$ †  | -1.7 ± 0.2 **% †   | 2.1 ± 0.2 *\$% †    |
| <b>Unordered</b>   | 9.4 ± 0.9 * †   | 10.3 ± 0.5 * †   | 5.9 ± 2.5 **\$     | -2.2 ± 0.5 # \$% † | -5.5 ± 0.5 **\$%    |

\*,  $P < 0.05$  vs buffer; #,  $P < 0.05$  vs CoA; \$,  $P < 0.05$  vs LPA; %,  $P < 0.05$  vs PA; @,  $P < 0.05$  vs OG; †,  $P < 0.05$  vs T94T wt.
